# Supplementary material
Source: publisher figshare collection journal article supplement (https://geolsoc.figshare.com/ndownloader/files/5426819)
Supplement: Supplementary file 1 [file 5426819]

	04-6-11	05b-6-31b	04-6-2	04-6-21
wt. % oxide
SiO2	68.13	63.24	67.62	59.23
TiO2	0.81	0.94	0.75	1.14
Al2O3	13.96	17.28	15.22	18.81
Fe2O3	1.95	2.38	0.50	11.54
FeO	3.49	5.51	5.25	n.d.
MnO	0.21	0.21	b.d.	0.17
MgO	2.62	3.33	2.68	4.39
CaO	2.66	1.42	1.93	0.98
Na2O	3.94	1.30	3.28	0.72
K2O	0.95	3.30	2.20	2.82
P2O5	0.17	0.13	b.d.	0.13
LOI	1.20	1.16	0.57	0.22
Total	100.09	100.20	100.00	100.15
mol. %
H2O	4.17	4.14	1.86	0.80
SiO2	70.98	67.61	70.28	65.22
Al2O3	8.57	10.89	8.82	12.21
CaO	2.97	1.63	1.51	1.16
MgO	4.07	5.31	3.54	7.21
FeO	4.57	6.84	7.21	9.56
K2O	0.63	2.25	3.09	1.98
Na2O	3.98	1.35	1.24	0.77
TiO2	0.63	0.76	1.03	0.94
O	0.77	0.96	0.12	0.10*
